# Supplementary material for: Clinical and Genomic Analysis of Liver Abscess-Causing Klebsiella pneumoniae Identifies New Liver Abscess-Associated Virulence Genes
Source: Front Cell Infect Microbiol. 2016 Nov 29;6:165. doi: 10.3389/fcimb.2016.00165 (PMC5126061; doi:10.3389/fcimb.2016.00165)
Supplement: Supplementary file 1 [file Table1.xlsx]

## Sheet: S1
Table S1. Primers of target genes used in this study.
Primers	Sequence (5'-3')	Reference
iroBCD cluster_F	AGAGGCTGGATTGGTGGCGTTTG	This study
iroBCD cluster_R	CGATCTGTGGAATACCGGCGTGTAG
iucABCD cluster_F	CCAACTCCGTCCGTACCCTGTCA	This study
iucABCD cluster_R	CGAGGGATCGACGATGGTGTTCT
SAM-dependent methyltransferases_F	TTGAATCTTACCCAGAGGAACTT	This study
SAM-dependent methyltransferases_R	AACAGCACCTTTCACAACGACAT
pagO_F	TGCTCTTGAAACTATCCCTCC	This study
pagO_R	GGCAATAACTCCCGTCCA
shiF_F	TGGCTCAATGCTGTTCCTG	This study
shiF_R	CCATCGCTGACACGGTAA
rmpA2_F	AGAGTATTGGTTGATAGCCGGA	This study
rmpA2_R	GAAATGTCAAGCCACATCCATTG
CP4-like integrase_F	GACACGGCTAAACCCAGAGA	This study
CP4-like integrase_R	TTGAGTTGCACATCGCGAAC
fecIRA cluster_F	ACTCCAGTCGGCCTTTGATG	This study
fecIRA cluster_R	GAACTGACGGAGACACCGAG
ibrB_F	TACCGGAGGTGGAGGTACTG	This study
ibrB_R	CCAGACGCGAAAGGTCTCTT
alginate lyase_F	TCGGAAAAAGATCTGCGCCT	This study
alginate lyase_R	GCTTCAAGGCTAGTGGCTCA
Fe3+-citrate ABC transporter_F	ACGTACACTTTTCGCAGCTC	This study
Fe3+-citrate ABC transporter_R	AGGAAAATCCGCAGTGGTGT
lysozyme_F	GGCAGATGAAGTCACCCACA	This study
lysozyme_R	GCTTGCAGTTGCTCAGGATG
luxR_F	CTTTGCCGGCATGGAACATA	This study
luxR_R	TGAGCCAAATGTATGCCAAGGA
hemin_F	ATGGTCGTGCTGATTGGGTT	This study
hemin_R	GACGCCACACAGAGGTAACA
wcaJ_F	GCGCGGAGTTGCTTTTTCTA	This study
wcaJ_R	ATGACGAAGCATATACCCCTGA
magA_F1	GGTGCTCTTTACATCATTGC	Fang et al. (2004)
magA_R1	GCAATGGCCATTTGCGTTAG
K2wzy-F1	GACCCGATATTCATACTTGACAGAG	Turton et al. (2008)
K2wzy-R1	CCTGAAGTAAAATCGTAAATAGATGGC
K5wzxF360	TGGTAGTGATGCTCGCGA	Turton et al. (2008)
K5wzxR639	CCTGAACCCACCCCAATC
wzxK54F	CATTAGCTCAGTGGTTGGCT	Fang et al. (2007)
wzxK54R	GCTTGACAAACACCATAGCAG
wzyK57F	CTCAGGGCTAGAAGTGTCAT	Fang et al. (2007)
wzyK57R	CACTAACCCAGAAAGTCGAG
wzyK20F	CGGTGCTACAGTGCATCATT	Fang et al. (2007)
wzyK20R	GTTATACGATGCTCAGTCGC
rmpA_F	ACTGGGCTACCTCTGCTTCA	Nadasy et al. (2007)
rmpA_R	CTTGCATGAGCCATCTTTCA

## Sheet: S2
Table S2. General information of 148 K. pneumoniae strains with published genome sequences used in this study&
Group	Disease	Sample ID#	ST	Serotype
LA-Kp	Liver abscess	ERR562354	23	K1
	Liver abscess	ERR713521	23	K1
	Liver abscess	ERR713643	23	K1
	Liver abscess	ERR562353	23	K1
	Liver abscess	ERR025673	23*	K1
	Liver abscess	ERR025468	23	K1
	Liver abscess	ERR712794	23	K1
	Liver abscess	ERR713641	23	K1
	Liver abscess	ERR712791	23	K1
	Liver abscess	ERR562360	23	K1
	Liver abscess	ERR712623	23	K1
	Liver abscess	ERR712625	23	K1
	Liver abscess	ERR712900	23	K1
	Liver abscess	ERR712626	23	K1
	Liver abscess	ERR025111	23	K1
	Liver abscess	ERR025117	23	K1
	Liver abscess	ERR713524	23	K1
	Liver abscess	ERR560501	57	K1
	Liver abscess	ERR712899	23	K1
	Liver abscess	ERR713523	260	K1
	Liver abscess	ERR712789	23	K1
	Liver abscess	ERR560508	23	K1
	Liver abscess	ERR713522	23	K1
	Liver abscess	ERR712793	23	K1
	Liver abscess	ERR560505	23	K1
	Liver abscess	ERR699266	23	K1
	Liver abscess	ERR718793	23	K1
	Liver abscess	ERR712790	23	K1
	Liver abscess	ERR706870	23	K1
	Liver abscess	ERR699269	23	K1
	Liver abscess	ERR562359	57	K1
	Liver abscess	ERR712792	23	K1
	Liver abscess	ERR713642	23	K1
	Liver abscess	ERR712624	23	K1
	Liver abscess	ERR560506	23	K1
	Liver abscess	ERR713644	23	K1
	Liver abscess	ERR560511	679	K2
	Liver abscess	ERR706869	25	K2
	Liver abscess	ERR560512	86	K2
	Liver abscess	ERR706868	86	K2
	Liver abscess	ERR025675	25	unknown
	Liver abscess	ERR025515	769	unknown
	Liver abscess	ERR025674	close to 806	unknown
	Liver abscess	ERR025462	231*?	unknown
	Liver abscess	ERR025655	660	unknown
K. pneumoniae isolated from blood	Bacteremia	ERR713647	249	K1
	Bacteremia	ERR713648	249	K1
	Bacteremia	ERR024847	66	K2
	Bacteremia	ERR720261	461	K2
	Bacteremia	ERR024852	37	unknown
	Bacteremia	ERR025546	17	unknown
	Bacteremia	ERR025118	48	unknown
	Bacteremia	ERR025099	152	unknown
	Bacteremia	ERR720245	35	unknown
	Bacteremia	ERR720244	close to 340	unknown
	Bacteremia	ERR025098	1059*	unknown
	Bacteremia	ERR024824	SLV-26	unknown
	Bacteremia	ERR025103	753	unknown
	Bacteremia	ERR720264	37	unknown
	Bacteremia	ERR720263	34	unknown
	Bacteremia	ERR720246	62	unknown
	Bacteremia	ERR720247	close to 1038	unknown
	Bacteremia	ERR025121	184	unknown
	Bacteremia	ERR720254	22	unknown
	Bacteremia	ERR024827	746*	unknown
	Bacteremia	ERR025544	42	unknown
	Bacteremia	ERR025101	14	unknown
	Bacteremia	ERR720262	192	unknown
	Bacteremia	ERR025100	14	unknown
	Bacteremia	ERR025102	DLV-363	unknown
	Bacteremia	ERR732774	1709	unknown
	Sepsis	ERR562357	23	K1
	Sepsis	ERR560504	86	K2
	Sepsis	ERR560502	14	K2
	Sepsis	ERR560516	380	K2
	Sepsis	ERR025644	60	K5
	Sepsis	ERR025652	65	unknown
	Sepsis	ERR025680	197	unknown
	Septicaemia	ERR562358	86	K2
	Septicaemia	ERR025590	25	K2
	Septicaemia	ERR025582	592?	K57
	Septicaemia	ERR025587	48	unknown
	Septicaemia	ERR025583	17	unknown
	Septicaemia	ERR025585	70*	unknown
	Septicaemia	ERR025538	1190	unknown
	Septicaemia	ERR025579	515	unknown
	Septicaemia	ERR025584	close to 489	unknown
	Septicaemia	ERR025589	15	unknown
	Septicaemia	ERR025586	750*	unknown
K. pneumoniae isolated from sputum and urine	Pneumonia	ERR024844	310	K1
	Pneumonia	ERR025654	23	K1
	Pneumonia	ERR025470	23?	K1
	Pneumonia	ERR025678	656*	K2
	Pneumonia	ERR025645	86	K2
	Pneumonia	ERR025676	219*?	K2
	Pneumonia	ERR024831	14	K2
	Pneumonia	ERR025670	23	K5
	Pneumonia	ERR025639	764	unknown
	Pneumonia	ERR025636	111	unknown
	Pneumonia	ERR025637	231	unknown
	Pneumonia	ERR025634	11	unknown
	Pneumonia	ERR024850	750	unknown
	Pneumonia	ERR024837	611*	unknown
	Pneumonia	ERR025632	776*	unknown
	Pneumonia	ERR025648	147	unknown
	Pneumonia	ERR024835	292	unknown
	Pneumonia	ERR024818	745*	unknown
	Pneumonia	ERR024826	695	unknown
	Pneumonia	ERR025633	777*	unknown
	Pneumonia	ERR024848	43	unknown
	Pneumonia	ERR024834	748*	unknown
	Pneumonia	ERR025473	231	unknown
	Pneumonia	ERR025463	SLV-344	unknown
	Urine tract infection	ERR025981	249	K1
	Urine tract infection	ERR024832	14	K2
	Urine tract infection	ERR024854	DLV-1007	K5
	Urine tract infection	ERR024819	1109	K54
	Urine tract infection	ERR024838	1109?	K54
	Urine tract infection	ERR025532	530	K54
	Urine tract infection	ERR024821	1109	K54
	Urine tract infection	ERR025599	254	unknown
	Urine tract infection	ERR025112	133*	unknown
	Urine tract infection	ERR025527	15	unknown
	Urine tract infection	ERR025104	48	unknown
	Urine tract infection	ERR025598	253	unknown
	Urine tract infection	ERR024830	369*	unknown
	Urine tract infection	ERR025596	45	unknown
	Urine tract infection	ERR025107	SLV-1402	unknown
	Urine tract infection	ERR025108	48	unknown
	Urine tract infection	ERR025105	184	unknown
	Urine tract infection	ERR025988	225	unknown
	Urine tract infection	ERR025980	189	unknown
	Urine tract infection	ERR025109	200	unknown
	Urine tract infection	ERR025626	215	unknown
	Urine tract infection	ERR025982	250	unknown
	Urine tract infection	ERR024840	20	unknown
	Urine tract infection	ERR025545	11	unknown
	Urine tract infection	ERR025592	251	unknown
	Urine tract infection	ERR024823	36	unknown
	Urine tract infection	ERR024853	695	unknown
	Urine tract infection	ERR025990	248	unknown
	Urine tract infection	ERR025597	252	unknown
	Urine tract infection	ERR024839	290	unknown
	Urine tract infection	ERR024836	20	unknown
	Urine tract infection	ERR025600	255	unknown
	Urine tract infection	ERR024851	751*	unknown
	Urine tract infection	ERR025989	247	unknown
	Urine tract infection	ERR024828	747	unknown
&Data were collected from public resource.
#Sample ID of the European Nucleotide Archive (ENA; http://www.ebi.ac.uk/ena)

## Sheet: S3
Table S3. Antimicrobial resistance (AMR) genes presented in 3 LA-Kp and 3 non-LA Kp strains
Group	Strain	Gene	Conferring resistance phenotype
LA-Kp	GN-2	fosA	Fosfomycin resistance
	GN-2	blaSHV-27	Beta-lactam resistance (ampicillin)
	GN-3	blaSHV-36	Beta-lactam resistance (ampicillin)
	NTUH-K2044	blaSHV-37	Beta-lactam resistance (ampicillin)
non-LA Kp	HS11286	blaKPC-2	Beta-lactam resistance
	HS11286	blaSHV-11	Beta-lactam resistance(ampicillin)
	HS11286	blaTEM-1B	Beta-lactam resistance
	HS11286	rmtB	Aminoglycoside resistance
	HS11286	blaCTX-M-14	Beta-lactam resistance
	HS11286	tet(G)	Tetracycline resistance
	HS11286	sul1	Sulphonamide resistance
	HS11286	aadA2	Aminoglycoside resistance
	HS11286	dfrA12	Trimethoprim resistance
	HS11286	blaTEM-1B	Beta-lactam resistance
	HS11286	aac(3)-IId	Aminoglycoside resistance
	HS11286	blaTEM-1B	Beta-lactam resistance
	HS11286	strB	Aminoglycoside resistance
	HS11286	strA	Aminoglycoside resistance
	HS11286	sul2	Sulphonamide resistance
	HS11286	blaCTX-M-14	Beta-lactam resistance
	XL-1	blaSHV-11	Beta-lactam resistance(ampicillin)
	XL-1	dfrA12	Trimethoprim resistance
	XL-1	aph(4)-Ia	Aminoglycoside resistance
	XL-1	blaKPC-2	Beta-lactam resistance
	XL-1	aadA2	Aminoglycoside resistance
	XL-1	aac(3)-IVa	Aminoglycoside resistance
	XL-1	sul1	Sulphonamide resistance
	MGH78578	blaSHV-12	Beta-lactam resistance
	MGH78578	strA	Aminoglycoside resistance
	MGH78578	strB	Aminoglycoside resistance
	MGH78578	blaSHV-11	Beta-lactam resistance(ampicillin)
	MGH78578	sul2	Sulphonamide resistance
	MGH78578	aac(6')-Ib	Aminoglycoside resistance
	MGH78578	aac(6')Ib-cr	Fluoroquinolone and aminoglycoside resistance
	MGH78578	aadA1	Aminoglycoside resistance
	MGH78578	blaOXA-9	Beta-lactam resistance
	MGH78578	blaTEM-1A	Beta-lactam resistance
	MGH78578	aph(3')-Ic	Aminoglycoside resistance
	MGH78578	sul1	Sulphonamide resistance
	MGH78578	cmlA1	Phenicol resistance
	MGH78578	aadB	Aminoglycoside resistance
	MGH78578	catA1	Phenicol resistance
	MGH78578	tet(D)	Tetracycline resistance
	MGH78578	blaTEM-1B	Beta-lactam resistance

## Sheet: S4
Table S4. Virulence genes uniquely found in 3 LA-Kp isolates (NTUH-K2044, GN-2 and GN-3 ) using the PATRIC VF database
Genebank ID*	Product
BAH65952.1	Glycosyltransferase IroB
BAH65950.1	Trilactone hydrolase IroD
BAH65951.1	ABC transporter protein IroC
BAH66194.1	Aerobactin biosynthesis protein IucD
BAH66195.1	Aerobactin biosynthesis protein IucC
BAH66196.1	Aerobactin biosynthesis protein IucB
BAH66197.1	Aerobactin biosynthesis protein IucA
BAH66193.1	Aerobactin siderophore receptor IutA
BAH65949.1	Outer Membrane Siderophore Receptor IroN
BAH66169.1	Permease of the drug/metabolite transporter (DMT) superfamily, pagO
* Genebank ID refered to NTUH-K2044 recorded in NCBI

## Sheet: S5
Table S5. 133 genes uniquely found in 3 LA-Kp genomes (NTUH-K2044, GN-2 and GN-3) using whole genome orthologous gene comparative analysis with 3 non-LA-Kp genomes (XL-1, HS11286 and MGH78578)
Genebank ID#	Location*	Annotation
BAH65932.1	P	Putative metal chaperone, involved in Zn homeostasis, GTPase of COG0523 family
BAH65933.1	P	ABC transporter (iron.B12.siderophore.hemin), permease component
BAH65934.1	P	ABC transporter (iron.B12.siderophore.hemin), periplasmic substrate-binding component
BAH65935.1	P	ABC transporter (iron.B12.siderophore.hemin), ATP-binding component
BAH65936.1	P	hypothetical protein
BAH65938.1	P	hypothetical protein
BAH65939.1	P	DinG family ATP-dependent helicase YoaA
BAH65940.1	P	DinG family ATP-dependent helicase YoaA
BAH65942.1	P	Mobile element protein
BAH65943.1	P	Putative SAM-dependent methyltransferases
BAH65944.1	P	hypothetical protein
BAH65945.1	P	hypothetical protein
BAH65946.1	P	hypothetical protein
BAH65947.1	P	Permease of the drug/metabolite transporter (DMT) superfamily
BAH65948.1	P	hypothetical protein
BAH65950.1	P	Trilactone hydrolase IroD
BAH65951.1	P	ABC transporter protein IroC
BAH65952.1	P	Glycosyltransferase IroB
BAH65954.1	P	Co-activator of prophage gene expression IbrB
BAH65956.1	P	Mobile element protein
BAH65957.1	P	Mobile element protein
BAH65959.1	P	RNA polymerase sigma factor FecI
BAH(26153..26674)	P	Iron(III) dicitrate transmembrane sensor protein FecR
BAH(27079..26957)	P	hypothetical protein
BAH65960.1	P	Iron(III) dicitrate transport protein FecA
BAH65961.1	P	hypothetical protein
BAH65964.1	P	hypothetical protein
BAH65965.1	P	hypothetical protein
BAH66021.1	P	hypothetical protein
BAH66022.1	P	hypothetical protein
BAH66024.1	P	Outer membrane protein
BAH66025.1	P	hypothetical protein
BAH66026.1	P	hypothetical protein
BAH66027.1	P	Thiol:disulfide interchange protein DsbC
BAH66086.1	P	hypothetical protein
BAH66087.1	P	hypothetical protein
BAH66091.1	P	Resolvase
BAH(128122..128006)	P	hypothetical protein
BAH66098.1	P	Error-prone, lesion bypass DNA polymerase V (UmuC)
BAH66106.1	P	hypothetical protein
BAH66107.1	P	hypothetical protein
BAH66108.1	P	hypothetical protein
BAH66109.1	P	hypothetical protein
BAH66111.1	P	hypothetical protein
BAH66112.1	P	hypothetical protein
BAH66113.1	P	putative recombinase
BAH66115.1	P	hypothetical protein
BAH66118.1	P	hypothetical protein
BAH66120.1	P	DNA replication protein
BAH(147813..147968)	P	hypothetical protein
BAH66121.1	P	YadA
BAH66122.1	P	hypothetical protein
BAH66135.1	P	FIG00641067: hypothetical protein
BAH66136.1	P	FIG032766: hypothetical protein
BAH66137.1	P	MbeA
BAH(162234..162380)	P	FIG001353: Acetyltransferase
BAH66138.1	P	hypothetical protein
BAH66140.1	P	FIG01221204: hypothetical protein
BAH66141.1	P	FIG01221168: hypothetical protein
BAH66142.1	P	FIG01220339: hypothetical protein
BAH66143.1	P	Putative tellurium resistance protein
BAH66144.1	P	Putative tellurium resistance protein
BAH66145.1	P	TerW
BAH66146.1	P	FIG00638193: hypothetical protein
BAH66147.1	P	Similar to citrate lyase beta subunit
BAH66148.1	P	putative ATP/GTP-binding protein protein
BAH66149.1	P	orf; Unknown function
BAH66150.1	P	COG0503: Adenine/guanine phosphoribosyltransferases and related PRPP-binding proteins
BAH66151.1	P	Carbamoylphosphate synthase large subunit (split gene in MJ)
BAH66153.1	P	Tellurium resistance protein TerD
BAH66154.1	P	Tellurium resistance protein TerA
BAH66155.1	P	Tellurite resistance protein TerB
BAH66156.1	P	Integral membrane protein TerC
BAH66157.1	P	Tellurium resistance protein TerD
BAH66158.1	P	Tellurium resistance protein TerD
BAH66159.1	P	Tellurium resistance protein
BAH66160.1	P	HAD-superfamily hydrolase
BAH66163.1	P	Dienelactone hydrolase and related enzymes
BAH(186715..186599)	P	hypothetical protein
BAH66164.1	P	DNA-invertase
BAH66165.1	P	Mobile element protein
BAH66167.1	P	Alcohol dehydrogenase (EC 1.1.1.1)
BAH66168.1	P	Mobile element protein
BAH66169.1	P	Permease of the drug/metabolite transporter (DMT) superfamily
BAH66170.1	P	Transcriptional regulator, AsnC family
BAH(195302..195120)	P	Transposase
BAH66173.1	P	FIG01217850: hypothetical protein
BAH66174.1	P	Uncharacterized protein yuaX
BAH66175.1	P	hypothetical protein
BAH66177.1	P	KorC
BAH66178.1	P	unknown
BAH66179.1	P	hypothetical protein
BAH66183.1	P	Mobile element protein
BAH65944.1	P	hypothetical protein
BAH66184.1	P	hypothetical protein
BAH66187.1	P	hypothetical protein
BAH66188.1	P	FIG00919029: hypothetical protein
BAH66189.1	P	Possible carboxymuconolactone decarboxylase family protein (EC 4.1.1.44)
BAH66190.1	P	FIG00640659: hypothetical protein
BAH66191.1	P	Transcriptional regulator, TetR family
BAH66192.1	P	conserved hypothetical protein; putative exported protein
BAH66194.1	P	L-lysine 6-monooxygenase [NADPH] (EC 1.14.13.59), aerobactin biosynthesis protein IucD @ Siderophore biosynthesis protein, monooxygenase
BAH66195.1	P	Aerobactin synthase (EC 6.3.2.39), aerobactin biosynthesis protein IucC
BAH66196.1	P	N6-hydroxylysine O-acetyltransferase (EC 2.3.1.102), aerobactin biosynthesis protein IucB @ Siderophore synthetase small component, acetyltransferase
BAH66197.1	P	N(2)-citryl-N(6)-acetyl-N(6)-hydroxylysine synthase (EC 6.3.2.38), aerobactin biosynthesis protein IucA
BAH66198.1	P	Possible H+-antiporter clustered with aerobactin genes
BAH66199.1	P	conserved hypothetical protein
BAH66200.1	P	ABC transporter protein IroC
BAH66201.1	P	Mobile element protein
BAH66202.1	P	Peptide deformylase (EC 3.5.1.88)
BAH66205.1	P	Periplasmic lysozyme inhibitor of c-type lysozyme
BAH66206.1	P	hypothetical protein
BAH66207.1	P	Putative metal chaperone, involved in Zn homeostasis, GTPase of COG0523 family
BAH61159.1	C	Alpha-aspartyl dipeptidase Peptidase E (EC 3.4.13.21)
BAH61507.1	C	Mobile element protein
BAH61508.1	C	hypothetical protein
BAH61509.1	C	hypothetical protein Pfl_5213
BAH(647284..647406)	C	hypothetical protein
BAH61919.1	C	Mobile element protein
BAH61925.1	C	site-specific recombinase, phage integrase family
BAH62442.1	C	TolA protein
BAH62564.1	C	hypothetical protein
BAH62872.1	C	Putative cytoplasmic protein
BAH63091.1	C	hypothetical protein
BAH(2419854..2419973)	C	hypothetical protein
BAH63383.1	C	hypothetical protein
BAH63793.1	C	CRISPR-associated protein Cas1
BAH63795.1	C	CRISPR-associated protein, Cse4 family
BAH64284.1	C	Phosphomannomutase (EC 5.4.2.8)
BAH64285.1	C	Mannose-1-phosphate guanylyltransferase (GDP) (EC 2.7.7.22) / Mannose-6-phosphate isomerase (EC 5.3.1.8)
BAH64287.1	C	Colanic acid biosynthsis UDP-glucose lipid carrier transferase WcaJ
BAH64342.1	C	FIG00453951: hypothetical protein
BAH65091.1	C	FIG00732567: hypothetical protein
#Genebank ID of NTUH-K2044 recorded in NCBI; Genes that were not annotated in NCBI were presented as BAH(Start position..end position)
*P represents genes located on plasmid; C represents genes located on chromosome.

## Sheet: S6
Table S6. Distributions of 133 LA-specific genes among 45 LA-Kp strains and 44 K. pneumoniae strains isolated from blood.
Genebank ID#	Annotation	Occurrence frequency in LA-Kp	Occurrence frequency in K. pneumoniae from blood	Accuracy rate
BAH63383.1	hypothetical protein	1	0.954545	0.52809
BAH(2419854..2419973)	hypothetical protein	1	0.954545	0.52809
BAH62442.1	TolA protein	1	0.931818	0.539326
BAH62564.1	hypothetical protein	1	0.909091	0.550562
BAH65091.1	FIG00732567: hypothetical protein	0.933333	0.795455	0.573034
BAH64284.1	Phosphomannomutase (EC 5.4.2.8)	0.955556	0.772727	0.595506
BAH64285.1	Mannose-1-phosphate guanylyltransferase (GDP) (EC 2.7.7.22) / Mannose-6-phosphate isomerase (EC 5.3.1.8)	0.955556	0.772727	0.595506
BAH61508.1	hypothetical protein	1	0.636364	0.685393
BAH(647284..647406)	hypothetical protein	1	0.636364	0.685393
BAH61509.1	hypothetical protein Pfl_5213	0.977778	0.613636	0.685393
BAH66091.1	Resolvase	0.977778	0.613636	0.685393
BAH61159.1	Alpha-aspartyl dipeptidase Peptidase E (EC 3.4.13.21)	0.866667	0.568182	0.651685
BAH66098.1	Error-prone, lesion bypass DNA polymerase V (UmuC)	0.911111	0.431818	0.741573
BAH61919.1	Mobile element protein	0.866667	0.409091	0.730337
BAH66086.1	hypothetical protein	0.933333	0.363636	0.786517
BAH66087.1	hypothetical protein	0.933333	0.340909	0.797753
BAH63091.1	hypothetical protein	0.8	0.340909	0.730337
BAH65964.1	hypothetical protein	0.933333	0.318182	0.808989
BAH65965.1	hypothetical protein	0.911111	0.318182	0.797753
BAH66111.1	hypothetical protein	0.844444	0.318182	0.764045
BAH66115.1	hypothetical protein	0.822222	0.318182	0.752809
BAH66106.1	hypothetical protein	0.888889	0.295455	0.797753
BAH66107.1	hypothetical protein	0.866667	0.295455	0.786517
BAH66109.1	hypothetical protein	0.866667	0.295455	0.786517
BAH66168.1	Mobile element protein	0.844444	0.295455	0.775281
BAH66112.1	hypothetical protein	0.844444	0.295455	0.775281
BAH66122.1	hypothetical protein	0.822222	0.295455	0.764045
BAH66113.1	putative recombinase	0.822222	0.295455	0.764045
BAH66121.1	YadA	0.8	0.295455	0.752809
BAH65932.1	Putative metal chaperone, involved in Zn homeostasis, GTPase of COG0523 family	0.955556	0.272727	0.842697
BAH65934.1	ABC transporter (iron.B12.siderophore.hemin), periplasmic substrate-binding component	0.955556	0.272727	0.842697
BAH66207.1	Putative metal chaperone, involved in Zn homeostasis, GTPase of COG0523 family	0.955556	0.272727	0.842697
BAH66108.1	hypothetical protein	0.866667	0.272727	0.797753
BAH66158.1	Tellurium resistance protein TerD	0.844444	0.272727	0.786517
BAH66148.1	putative ATP/GTP-binding protein protein	0.844444	0.272727	0.786517
BAH66157.1	Tellurium resistance protein TerD	0.822222	0.272727	0.775281
BAH66136.1	FIG032766: hypothetical protein	0.822222	0.272727	0.775281
BAH66160.1	HAD-superfamily hydrolase	0.822222	0.272727	0.775281
BAH66154.1	Tellurium resistance protein TerA	0.822222	0.272727	0.775281
BAH66151.1	Carbamoylphosphate synthase large subunit (split gene in MJ)	0.822222	0.272727	0.775281
BAH66159.1	Tellurium resistance protein	0.822222	0.272727	0.775281
BAH66155.1	Tellurite resistance protein TerB	0.822222	0.272727	0.775281
BAH66149.1	orf; Unknown function	0.822222	0.272727	0.775281
BAH66156.1	Integral membrane protein TerC	0.822222	0.272727	0.775281
BAH66153.1	Tellurium resistance protein TerD	0.777778	0.272727	0.752809
BAH65942.1	Mobile element protein	0.955556	0.25	0.853933
BAH65947.1	Permease of the drug/metabolite transporter (DMT) superfamily	0.955556	0.25	0.853933
BAH65948.1	hypothetical protein	0.955556	0.25	0.853933
BAH65946.1	hypothetical protein (luxR)	0.955556	0.25	0.853933
BAH65952.1	Glycosyltransferase IroB	0.955556	0.25	0.853933
BAH65944.1	hypothetical protein	0.955556	0.25	0.853933
BAH65933.1	ABC transporter (iron.B12.siderophore.hemin), permease component	0.955556	0.25	0.853933
BAH65943.1	Putative SAM-dependent methyltransferases	0.955556	0.25	0.853933
BAH(128122..128006)	hypothetical protein	0.866667	0.25	0.808989
BAH66137.1	MbeA	0.866667	0.25	0.808989
BAH66140.1	FIG01221204: hypothetical protein	0.822222	0.25	0.786517
BAH66150.1	COG0503: Adenine/guanine phosphoribosyltransferases and related PRPP-binding proteins	0.822222	0.25	0.786517
BAH66146.1	FIG00638193: hypothetical protein	0.822222	0.25	0.786517
BAH66147.1	Similar to citrate lyase beta subunit	0.822222	0.25	0.786517
BAH66143.1	Putative tellurium resistance protein	0.822222	0.25	0.786517
BAH66141.1	FIG01221168: hypothetical protein	0.822222	0.25	0.786517
BAH66142.1	FIG01220339: hypothetical protein	0.822222	0.25	0.786517
BAH66135.1	FIG00641067: hypothetical protein	0.822222	0.25	0.786517
BAH65951.1	ABC transporter protein IroC	0.955556	0.227273	0.865169
BAH65950.1	Trilactone hydrolase IroD	0.955556	0.227273	0.865169
BAH65961.1	hypothetical protein	0.933333	0.227273	0.853933
BAH65957.1	Mobile element protein	0.933333	0.227273	0.853933
BAH65959.1	RNA polymerase sigma factor FecI	0.933333	0.227273	0.853933
BAH66196.1	N6-hydroxylysine O-acetyltransferase (EC 2.3.1.102), aerobactin biosynthesis protein IucB @ Siderophore synthetase small component, acetyltransferase	0.933333	0.227273	0.853933
BAH65956.1	Mobile element protein	0.933333	0.227273	0.853933
BAH66194.1	L-lysine 6-monooxygenase [NADPH] (EC 1.14.13.59), aerobactin biosynthesis protein IucD @ Siderophore biosynthesis protein, monooxygenase	0.933333	0.227273	0.853933
BAH(27079..26957)	hypothetical protein	0.933333	0.227273	0.853933
BAH66200.1	ABC transporter protein IroC	0.911111	0.227273	0.842697
BAH66206.1	hypothetical protein	0.911111	0.227273	0.842697
BAH66202.1	Peptide deformylase (EC 3.5.1.88)	0.911111	0.227273	0.842697
BAH66163.1	Dienelactone hydrolase and related enzymes	0.888889	0.227273	0.831461
BAH66189.1	Possible carboxymuconolactone decarboxylase family protein (EC 4.1.1.44)	0.888889	0.227273	0.831461
BAH66192.1	conserved hypothetical protein; putative exported protein	0.888889	0.227273	0.831461
BAH66187.1	hypothetical protein	0.888889	0.227273	0.831461
BAH66190.1	FIG00640659: hypothetical protein	0.888889	0.227273	0.831461
BAH66188.1	FIG00919029: hypothetical protein	0.888889	0.227273	0.831461
BAH(186715..186599)	hypothetical protein	0.888889	0.227273	0.831461
BAH66191.1	Transcriptional regulator, TetR family	0.888889	0.227273	0.831461
BAH66164.1	DNA-invertase	0.888889	0.227273	0.831461
BAH66165.1	Mobile element protein	0.866667	0.227273	0.820225
BAH66118.1	hypothetical protein	0.777778	0.227273	0.775281
BAH66138.1	hypothetical protein	0.777778	0.227273	0.775281
BAH66195.1	Aerobactin synthase (EC 6.3.2.39), aerobactin biosynthesis protein IucC	0.933333	0.204545	0.865169
BAH66198.1	Possible H+-antiporter clustered with aerobactin genes	0.933333	0.204545	0.865169
BAH66197.1	N(2)-citryl-N(6)-acetyl-N(6)-hydroxylysine synthase (EC 6.3.2.38), aerobactin biosynthesis protein IucA	0.933333	0.204545	0.865169
BAH65954.1	Co-activator of prophage gene expression IbrB	0.933333	0.204545	0.865169
BAH(26153..26674)	Iron(III) dicitrate transmembrane sensor protein FecR	0.933333	0.204545	0.865169
BAH65960.1	Iron(III) dicitrate transport protein FecA	0.933333	0.204545	0.865169
BAH66199.1	conserved hypothetical protein	0.911111	0.204545	0.853933
BAH66205.1	Periplasmic lysozyme inhibitor of c-type lysozyme	0.911111	0.204545	0.853933
BAH61507.1	Mobile element protein	0.866667	0.204545	0.831461
BAH65940.1	DinG family ATP-dependent helicase YoaA	0.866667	0.204545	0.831461
BAH65935.1	ABC transporter (iron.B12.siderophore.hemin), ATP-binding component	0.844444	0.204545	0.820225
BAH66145.1	TerW	0.822222	0.204545	0.808989
BAH66144.1	Putative tellurium resistance protein	0.822222	0.204545	0.808989
BAH(162234..162380)	FIG001353: Acetyltransferase	0.8	0.204545	0.797753
BAH(147813..147968)	hypothetical protein	0.777778	0.204545	0.786517
BAH65944.1	hypothetical protein	0.888889	0.181818	0.853933
BAH65945.1	hypothetical protein	0.888889	0.181818	0.853933
BAH66201.1	Mobile element protein	0.866667	0.181818	0.842697
BAH65936.1	hypothetical protein	0.866667	0.181818	0.842697
BAH66177.1	KorC	0.844444	0.181818	0.831461
BAH66027.1	Thiol:disulfide interchange protein DsbC	0.844444	0.181818	0.831461
BAH66175.1	hypothetical protein	0.844444	0.181818	0.831461
BAH66179.1	hypothetical protein	0.844444	0.181818	0.831461
BAH66169.1	Permease of the drug/metabolite transporter (DMT) superfamily	0.844444	0.181818	0.831461
BAH66170.1	Transcriptional regulator, AsnC family	0.844444	0.181818	0.831461
BAH66183.1	Mobile element protein	0.844444	0.181818	0.831461
BAH66173.1	FIG01217850: hypothetical protein	0.822222	0.181818	0.820225
BAH66174.1	Uncharacterized protein yuaX	0.822222	0.181818	0.820225
BAH65939.1	DinG family ATP-dependent helicase YoaA	0.8	0.181818	0.808989
BAH66167.1	Alcohol dehydrogenase (EC 1.1.1.1)	0.777778	0.181818	0.797753
BAH63795.1	CRISPR-associated protein, Cse4 family	0.733333	0.181818	0.775281
BAH63793.1	CRISPR-associated protein Cas1	0.733333	0.181818	0.775281
BAH66120.1	DNA replication protein	0.2	0.181818	0.505618
BAH66178.1	unknown	0.844444	0.159091	0.842697
BAH66184.1	hypothetical protein	0.844444	0.159091	0.842697
BAH(195302..195120)	Transposase	0.844444	0.159091	0.842697
BAH66026.1	hypothetical protein	0.822222	0.159091	0.831461
BAH65938.1	hypothetical protein	0.8	0.159091	0.820225
BAH66025.1	hypothetical protein	0.8	0.136364	0.831461
BAH66021.1	hypothetical protein	0.8	0.136364	0.831461
BAH66024.1	Outer membrane protein	0.8	0.136364	0.831461
BAH66022.1	hypothetical protein	0.8	0.113636	0.842697
BAH64342.1	FIG00453951: hypothetical protein	0.8	0.0909091	0.853933
BAH61925.1	site-specific recombinase, phage integrase family	0.8	0.0909091	0.853933
BAH64287.1	Colanic acid biosynthsis UDP-glucose lipid carrier transferase WcaJ	0.8	0.0909091	0.853933
BAH62872.1	Putative cytoplasmic protein	0.0444444	0	0.516854
#Genebank ID of NTUH-K2044 recorded in NCBI; Genes that were not annotated in NCBI were presented as BAH(Start position..end position)

## Sheet: S7
Table S7. Distributions of 133 LA-associated genes among 45 LA-K strains and 59 K. pneumoniae strains isolated from sputum and urine*
Genebank ID#	Annotation	Occurrence frequency in LA-Kp	Occurrence frequency in K. pneumoniae from sputum and urine	Accuracy rate
BAH65961.1	hypothetical protein	0.933333	0.0677966	0.932692
BAH65957.1	Mobile element protein	0.933333	0.0677966	0.932692
BAH65959.1	RNA polymerase sigma factor FecI	0.933333	0.0677966	0.932692
BAH65956.1	Mobile element protein	0.933333	0.0677966	0.932692
BAH(27079..26957)	hypothetical protein	0.933333	0.0677966	0.932692
BAH65954.1	Co-activator of prophage gene expression IbrB	0.933333	0.0677966	0.932692
BAH(26153..26674)	Iron(III) dicitrate transmembrane sensor protein FecR	0.933333	0.0677966	0.932692
BAH65951.1	ABC transporter protein IroC	0.955556	0.101695	0.923077
BAH66195.1	Aerobactin synthase (EC 6.3.2.39), aerobactin biosynthesis protein IucC	0.933333	0.0847458	0.923077
BAH65942.1	Mobile element protein	0.955556	0.101695	0.923077
BAH66198.1	Possible H+-antiporter clustered with aerobactin genes	0.933333	0.0847458	0.923077
BAH65947.1	Permease of the drug/metabolite transporter (DMT) superfamily	0.955556	0.101695	0.923077
BAH66197.1	N(2)-citryl-N(6)-acetyl-N(6)-hydroxylysine synthase (EC 6.3.2.38), aerobactin biosynthesis protein IucA	0.933333	0.0847458	0.923077
BAH65950.1	Trilactone hydrolase IroD	0.955556	0.101695	0.923077
BAH66199.1	conserved hypothetical protein	0.911111	0.0677966	0.923077
BAH66196.1	N6-hydroxylysine O-acetyltransferase (EC 2.3.1.102), aerobactin biosynthesis protein IucB @ Siderophore synthetase small component, acetyltransferase	0.933333	0.0847458	0.923077
BAH65946.1	hypothetical protein	0.955556	0.101695	0.923077
BAH65952.1	Glycosyltransferase IroB	0.955556	0.101695	0.923077
BAH66194.1	L-lysine 6-monooxygenase [NADPH] (EC 1.14.13.59), aerobactin biosynthesis protein IucD @ Siderophore biosynthesis protein, monooxygenase	0.933333	0.0847458	0.923077
BAH65944.1	hypothetical protein	0.955556	0.101695	0.923077
BAH65960.1	Iron(III) dicitrate transport protein FecA	0.933333	0.0847458	0.923077
BAH65933.1	ABC transporter (iron.B12.siderophore.hemin), permease component	0.955556	0.101695	0.923077
BAH65943.1	Putative SAM-dependent methyltransferases	0.955556	0.101695	0.923077
BAH66205.1	Periplasmic lysozyme inhibitor of c-type lysozyme	0.911111	0.0677966	0.923077
BAH65948.1	hypothetical protein	0.955556	0.118644	0.913462
BAH65944.1	hypothetical protein	0.888889	0.0677966	0.913462
BAH65945.1	hypothetical protein	0.888889	0.0677966	0.913462
BAH61925.1	site-specific recombinase, phage integrase family	0.8	0.0338983	0.894231
BAH64342.1	FIG00453951: hypothetical protein	0.8	0.0677966	0.875
BAH64287.1	Colanic acid biosynthsis UDP-glucose lipid carrier transferase WcaJ	0.8	0.0677966	0.875
BAH66200.1	ABC transporter protein IroC	0.911111	0.0677966	0.923077
BAH65932.1	Putative metal chaperone, involved in Zn homeostasis, GTPase of COG0523 family	0.955556	0.101695	0.923077
BAH66206.1	hypothetical protein	0.911111	0.0677966	0.923077
BAH66202.1	Peptide deformylase (EC 3.5.1.88)	0.911111	0.0677966	0.923077
BAH65934.1	ABC transporter (iron.B12.siderophore.hemin), periplasmic substrate-binding component	0.955556	0.101695	0.923077
BAH66207.1	Putative metal chaperone, involved in Zn homeostasis, GTPase of COG0523 family	0.955556	0.101695	0.923077
BAH66163.1	Dienelactone hydrolase and related enzymes	0.888889	0.0677966	0.913462
BAH66189.1	Possible carboxymuconolactone decarboxylase family protein (EC 4.1.1.44)	0.888889	0.0677966	0.913462
BAH66192.1	conserved hypothetical protein; putative exported protein	0.888889	0.0677966	0.913462
BAH66187.1	hypothetical protein	0.888889	0.0677966	0.913462
BAH66190.1	FIG00640659: hypothetical protein	0.888889	0.0677966	0.913462
BAH66188.1	FIG00919029: hypothetical protein	0.888889	0.0677966	0.913462
BAH(186715..186599)	hypothetical protein	0.888889	0.0677966	0.913462
BAH66191.1	Transcriptional regulator, TetR family	0.888889	0.0677966	0.913462
BAH66164.1	DNA-invertase	0.888889	0.0677966	0.913462
BAH66201.1	Mobile element protein	0.866667	0.0677966	0.903846
BAH66027.1	Thiol:disulfide interchange protein DsbC	0.844444	0.0508475	0.903846
BAH66165.1	Mobile element protein	0.866667	0.0677966	0.903846
BAH66177.1	KorC	0.844444	0.0677966	0.894231
BAH66178.1	unknown	0.844444	0.0677966	0.894231
BAH65936.1	hypothetical protein	0.866667	0.0847458	0.894231
BAH66175.1	hypothetical protein	0.844444	0.0677966	0.894231
BAH66184.1	hypothetical protein	0.844444	0.0677966	0.894231
BAH(195302..195120)	Transposase	0.844444	0.0677966	0.894231
BAH66179.1	hypothetical protein	0.844444	0.0677966	0.894231
BAH66169.1	Permease of the drug/metabolite transporter (DMT) superfamily	0.844444	0.0677966	0.894231
BAH66026.1	hypothetical protein	0.822222	0.0508475	0.894231
BAH66170.1	Transcriptional regulator, AsnC family	0.844444	0.0677966	0.894231
BAH66183.1	Mobile element protein	0.844444	0.0677966	0.894231
BAH65935.1	ABC transporter (iron.B12.siderophore.hemin), ATP-binding component	0.844444	0.0847458	0.884615
BAH66025.1	hypothetical protein	0.8	0.0508475	0.884615
BAH66022.1	hypothetical protein	0.8	0.0508475	0.884615
BAH66173.1	FIG01217850: hypothetical protein	0.822222	0.0677966	0.884615
BAH66021.1	hypothetical protein	0.8	0.0508475	0.884615
BAH65940.1	DinG family ATP-dependent helicase YoaA	0.866667	0.101695	0.884615
BAH66024.1	Outer membrane protein	0.8	0.0508475	0.884615
BAH66174.1	Uncharacterized protein yuaX	0.822222	0.0677966	0.884615
BAH65938.1	hypothetical protein	0.8	0.0847458	0.865385
BAH65939.1	DinG family ATP-dependent helicase YoaA	0.8	0.0847458	0.865385
BAH66137.1	MbeA	0.866667	0.135593	0.865385
BAH66087.1	hypothetical protein	0.933333	0.20339	0.855769
BAH66158.1	Tellurium resistance protein TerD	0.844444	0.135593	0.855769
BAH66086.1	hypothetical protein	0.933333	0.20339	0.855769
BAH66148.1	putative ATP/GTP-binding protein protein	0.844444	0.135593	0.855769
BAH66157.1	Tellurium resistance protein TerD	0.822222	0.135593	0.846154
BAH(162234..162380)	FIG001353: Acetyltransferase	0.8	0.118644	0.846154
BAH66140.1	FIG01221204: hypothetical protein	0.822222	0.135593	0.846154
BAH66160.1	HAD-superfamily hydrolase	0.822222	0.135593	0.846154
BAH66150.1	COG0503: Adenine/guanine phosphoribosyltransferases and related PRPP-binding proteins	0.822222	0.135593	0.846154
BAH66154.1	Tellurium resistance protein TerA	0.822222	0.135593	0.846154
BAH66146.1	FIG00638193: hypothetical protein	0.822222	0.135593	0.846154
BAH66151.1	Carbamoylphosphate synthase large subunit (split gene in MJ)	0.822222	0.135593	0.846154
BAH66147.1	Similar to citrate lyase beta subunit	0.822222	0.135593	0.846154
BAH66143.1	Putative tellurium resistance protein	0.822222	0.135593	0.846154
BAH66141.1	FIG01221168: hypothetical protein	0.822222	0.135593	0.846154
BAH66145.1	TerW	0.822222	0.135593	0.846154
BAH66142.1	FIG01220339: hypothetical protein	0.822222	0.135593	0.846154
BAH66159.1	Tellurium resistance protein	0.822222	0.135593	0.846154
BAH66155.1	Tellurite resistance protein TerB	0.822222	0.135593	0.846154
BAH66149.1	orf; Unknown function	0.822222	0.135593	0.846154
BAH65964.1	hypothetical protein	0.933333	0.220339	0.846154
BAH66156.1	Integral membrane protein TerC	0.822222	0.135593	0.846154
BAH66167.1	Alcohol dehydrogenase (EC 1.1.1.1)	0.777778	0.101695	0.846154
BAH66144.1	Putative tellurium resistance protein	0.822222	0.135593	0.846154
BAH66153.1	Tellurium resistance protein TerD	0.777778	0.118644	0.836538
BAH66118.1	hypothetical protein	0.777778	0.118644	0.836538
BAH66138.1	hypothetical protein	0.777778	0.118644	0.836538
BAH66106.1	hypothetical protein	0.888889	0.20339	0.836538
BAH65965.1	hypothetical protein	0.911111	0.220339	0.836538
BAH(147813..147968)	hypothetical protein	0.777778	0.118644	0.836538
BAH(128122..128006)	hypothetical protein	0.866667	0.20339	0.826923
BAH66136.1	FIG032766: hypothetical protein	0.822222	0.169492	0.826923
BAH66122.1	hypothetical protein	0.822222	0.169492	0.826923
BAH66107.1	hypothetical protein	0.866667	0.20339	0.826923
BAH66109.1	hypothetical protein	0.866667	0.20339	0.826923
BAH66135.1	FIG00641067: hypothetical protein	0.822222	0.169492	0.826923
BAH66108.1	hypothetical protein	0.866667	0.20339	0.826923
BAH66112.1	hypothetical protein	0.844444	0.20339	0.817308
BAH66111.1	hypothetical protein	0.844444	0.20339	0.817308
BAH61507.1	Mobile element protein	0.866667	0.220339	0.817308
BAH63795.1	CRISPR-associated protein, Cse4 family	0.733333	0.135593	0.807692
BAH66115.1	hypothetical protein	0.822222	0.20339	0.807692
BAH63793.1	CRISPR-associated protein Cas1	0.733333	0.135593	0.807692
BAH66113.1	putative recombinase	0.822222	0.20339	0.807692
BAH66121.1	YadA	0.8	0.20339	0.798077
BAH66098.1	Error-prone, lesion bypass DNA polymerase V (UmuC)	0.911111	0.322034	0.778846
BAH66168.1	Mobile element protein	0.844444	0.338983	0.740385
BAH61919.1	Mobile element protein	0.866667	0.440678	0.692308
BAH61159.1	Alpha-aspartyl dipeptidase Peptidase E (EC 3.4.13.21)	0.866667	0.440678	0.692308
BAH61508.1	hypothetical protein	1	0.559322	0.682692
BAH(647284..647406)	hypothetical protein	1	0.559322	0.682692
BAH61509.1	hypothetical protein Pfl_5213	0.977778	0.559322	0.673077
BAH63091.1	hypothetical protein	0.8	0.440678	0.663462
BAH66091.1	Resolvase	0.977778	0.661017	0.615385
BAH66120.1	DNA replication protein	0.2	0.0847458	0.605769
BAH64284.1	Phosphomannomutase (EC 5.4.2.8)	0.955556	0.745763	0.557692
BAH64285.1	Mannose-1-phosphate guanylyltransferase (GDP) (EC 2.7.7.22) / Mannose-6-phosphate isomerase (EC 5.3.1.8)	0.955556	0.745763	0.557692
BAH65091.1	FIG00732567: hypothetical protein	0.933333	0.779661	0.528846
BAH63383.1	hypothetical protein	1	0.881356	0.5
BAH62564.1	hypothetical protein	1	0.881356	0.5
BAH62872.1	Putative cytoplasmic protein	0.0444444	0.152542	0.5
BAH62442.1	TolA protein	1	0.966102	0.451923
BAH(2419854..2419973)	hypothetical protein	1	0.966102	0.451923
* genes in red colour represent the 30 LA-associated genes identified in the analysis of 45 LA-Kp and 44 K. pneumoniae isolates from blood
#Genebank ID of NTUH-K2044 recorded in NCBI; Genes that were not annotated in NCBI were presented as BAH(Start position..end position)
